# Supplementary material for: Co-Exposure with an Invasive Seaweed Exudate Increases Toxicity of Polyamide Microplastics in the Marine Mussel Mytilus galloprovincialis
Source: MDPI journal article supplement (doi:10.3390/toxics10020043), 2022-01-18
Supplement: s1 [file s1]

# Supplementary Materials: Co-Exposure with an Invasive Seaweed Exudate Increases Toxicity of Polyamide Microplastics in the Marine Mussel *Mytilus galloprovincialis*

Filipa G. Rodrigues, Hugo C. Vieira, Diana Campos, Sílvia F.S. Pires, Andreia C.M. Rodrigues, Ana L.P. Silva, Amadeu M.V.M. Soares, Jacinta M.M. Oliveira and Maria D. Bordalo

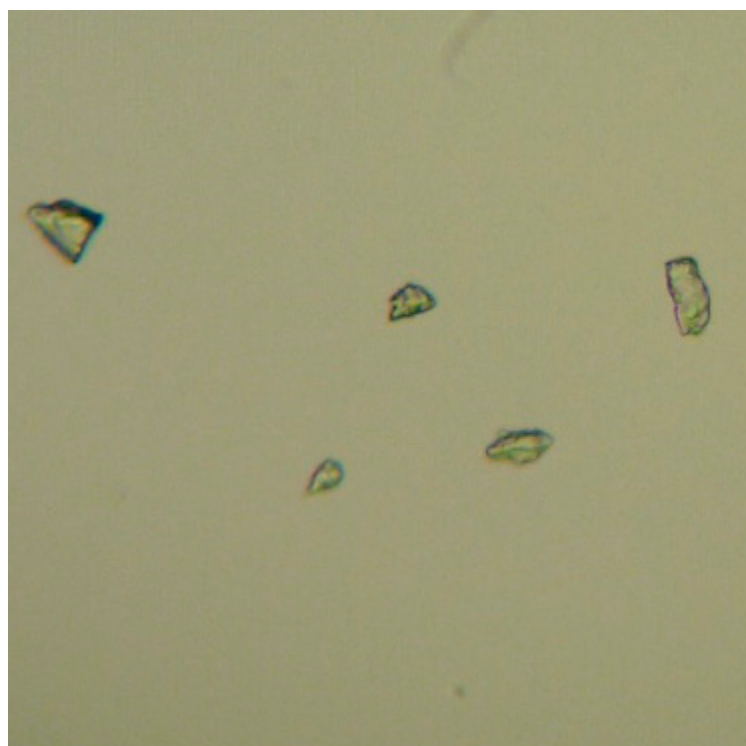

**Figure S1.** Irregularly shaped polyamide microplastics (PA-MPs). Images taken at 10x magnification (Zeiss Primo Star light microscope, Jena, Germany).

**Table S1.** Two-way ANOVA analysis results on oxidative stress-related biomarker responses in *Mytilus galloprovincialis* gills with *Asparagopsis armata* exudate and PA-MPs exposures as factors.

| Biomarker | Factor      | df    | F     | <i>p</i>     | % of Total Variation |
|-----------|-------------|-------|-------|--------------|----------------------|
| CAT       | Exudate     | 1, 24 | 1.594 | 0.219        | 4.993                |
|           | PA-MPs      | 1, 24 | 5.839 | <b>0.024</b> | 18.300               |
|           | Interaction | 1, 24 | 0.481 | 0.495        | 1.506                |
| GST       | Exudate     | 1, 24 | 0.658 | 0.425        | 2.669                |
|           | PA-MPs      | 1, 24 | 0.007 | 0.935        | 0.028                |
|           | Interaction | 1, 24 | 0.001 | 0.935        | 0.006                |
| tGSH      | Exudate     | 1, 24 | 0.001 | 0.979        | 0.002                |
|           | PA-MPs      | 1, 24 | 6.688 | <b>0.016</b> | 18.910               |
|           | Interaction | 1, 24 | 4.677 | <b>0.041</b> | 13.230               |
| PC        | Exudate     | 1, 24 | 3.038 | 0.094        | 8.943                |
|           | PA-MPs      | 1, 24 | 2.558 | 0.123        | 7.528                |
|           | Interaction | 1, 24 | 4.380 | <b>0.047</b> | 12.890               |
| LPO       | Exudate     | 1, 24 | 0.261 | 0.614        | 0.967                |

---

|      |             |       |        |       |        |
|------|-------------|-------|--------|-------|--------|
|      | PA-MPs      | 1, 24 | 0.010  | 0.923 | 0.035  |
|      | Interaction | 1, 24 | 2.707  | 0.113 | 10.030 |
|      | Exudate     | 1, 24 | 0.007  | 0.932 | 0.029  |
| AChE | PA-MPs      | 1, 24 | <0.001 | 0.993 | <0.001 |
|      | Interaction | 1, 24 | 1.997  | 0.170 | 7.680  |

---

**Bold** denotes statistical significance ( $p < 0.05$ ).

**Table S2.** Results for two-way ANOVA analysis on biochemical biomarkers responses in the digestive gland of *M. galloprovincialis* with *A. armata* exudate exposure and water temperature as factors.

| Biomarker | Factor      | df    | F      | <i>p</i>     | % of Total Variation |
|-----------|-------------|-------|--------|--------------|----------------------|
| CAT       | Exudate     | 1, 24 | 0.095  | 0.761        | 0.331                |
|           | PA-MPs      | 1, 24 | 0.007  | 0.935        | 0.024                |
|           | Interaction | 1, 24 | 4.475  | <b>0.045</b> | 15.660               |
| GST       | Exudate     | 1, 24 | 0.601  | 0.446        | 2.399                |
|           | PA-MPs      | 1, 24 | 0.001  | 0.978        | 0.003                |
|           | Interaction | 1, 24 | 1.507  | 0.232        | 6.017                |
| tGSH      | Exudate     | 1, 24 | 0.268  | 0.598        | 1.023                |
|           | PA-MPs      | 1, 24 | 3.368  | 0.079        | 12.040               |
|           | Interaction | 1, 24 | 0.306  | 0.585        | 1.094                |
| PC        | Exudate     | 1, 24 | 2.451  | 0.131        | 6.403                |
|           | PA-MPs      | 1, 24 | 11.814 | <b>0.002</b> | 30.870               |
|           | Interaction | 1, 24 | 0.008  | 0.929        | 0.021                |
| LPO       | Exudate     | 1, 24 | 1.359  | 0.255        | 5.206                |
|           | PA-MPs      | 1, 24 | 0.408  | 0.529        | 1.562                |
|           | Interaction | 1, 24 | 0.344  | 0.563        | 1.318                |
| AChE      | Exudate     | 1, 24 | 0.741  | 0.398        | 2.963                |
|           | PA-MPs      | 1, 24 | <0.001 | 0.990        | <0.001               |
|           | Interaction | 1, 24 | 0.270  | 0.608        | 1.080                |

**Bold** denotes statistical significance ( $p < 0.05$ ).

**Table S3.** Results for two-way ANOVA analysis on biochemical biomarkers responses in the muscle of *M. galloprovincialis* with *A. armata* exudate exposure and water temperature as factors.

| Biomarker | Factor      | df    | F      | <i>p</i>     | % of Total Variation |
|-----------|-------------|-------|--------|--------------|----------------------|
| LPO       | Exudate     | 1, 24 | 0.016  | 0.899        | 0.068                |
|           | PA-MPs      | 1, 24 | <0.001 | 0.984        | 0.002                |
|           | Interaction | 1, 24 | 0.004  | 0.951        | 0.016                |
| PC        | Exudate     | 1, 24 | 0.032  | 0.861        | 0.118                |
|           | PA-MPs      | 1, 24 | 1.702  | 0.201        | 6.388                |
|           | Interaction | 1, 24 | 0.913  | 0.349        | 3.426                |
| AChE      | Exudate     | 1, 24 | 5.552  | <b>0.027</b> | 18.420               |
|           | PA-MPs      | 1, 24 | 0.065  | 0.801        | 0.216                |
|           | Interaction | 1, 24 | 0.526  | 0.475        | 1.745                |
| LDH       | Exudate     | 1, 24 | 0.281  | 0.601        | 1.044                |
|           | PA-MPs      | 1, 24 | 1.346  | 0.257        | 5.005                |
|           | Interaction | 1, 24 | 1.267  | 0.271        | 4.711                |
| Elipids   | Exudate     | 1, 24 | 0.004  | 0.948        | 0.015                |
|           | PA-MPs      | 1, 24 | 4.117  | 0.054        | 14.470               |
|           | Interaction | 1, 24 | 0.329  | 0.572        | 1.156                |
| Eproteins | Exudate     | 1, 24 | 0.347  | 0.561        | 1.200                |
|           | PA-MPs      | 1, 24 | 2.326  | 0.140        | 8.037                |
|           | Interaction | 1, 24 | 2.270  | 0.145        | 7.844                |
| Esugars   | Exudate     | 1, 24 | 0.707  | 0.409        | 1.834                |
|           | PA-MPs      | 1, 24 | 0.342  | 0.564        | 0.887                |
|           | Interaction | 1, 24 | 14.499 | <b>0.001</b> | 37.600               |
| Ea        | Exudate     | 1, 24 | 0.126  | 0.726        | 0.456                |
|           | PA-MPs      | 1, 24 | 2.870  | 0.103        | 10.420               |
|           | Interaction | 1, 24 | 0.540  | 0.470        | 1.960                |
| ETS       | Exudate     | 1, 24 | 0.066  | 0.800        | 0.217                |
|           | PA-MPs      | 1, 24 | 6.162  | <b>0.020</b> | 20.300               |
|           | Interaction | 1, 24 | 0.128  | 0.723        | 0.423                |
| CEA       | Exudate     | 1, 24 | 0.511  | 0.482        | 1.577                |
|           | PA-MPs      | 1, 24 | 6.219  | <b>0.020</b> | 19.190               |
|           | Interaction | 1, 24 | 1.679  | 0.207        | 5.179                |

**Bold** denotes statistical significance ( $p < 0.05$ ).
